# Supplementary material for: Wide-bandgap quantum dots with large-span fluorescence switching and two-photon emission via protonation/deprotonation
Source: Royal Society of Chemistry journal article supplement (doi:10.1039/d4tc04911j), 2025-01-01
Supplement: d4tc04911j1.pdf [file d4tc04911j1.pdf]

**Wide-bandgap Quantum Dots with Large-span Fluorescence  
Switching and Two-photon Emission *via*  
Protonation/Deprotonation**

Yamei Ding<sup>a</sup>, Mingyu Xie<sup>a</sup>, Ping He<sup>a</sup>, Ziqi Zhao<sup>a</sup>, Huiwen Lin<sup>1</sup>, Li Tao<sup>a,b,\*</sup>

<sup>a</sup>School of Materials Science and Engineering, Jiangsu Key Laboratory of Advanced Metallic Materials, Southeast University, Nanjing, 211189, China

<sup>b</sup>Ministry of Education Key Laboratory of Quantum Materials and Devices, Southeast University, Nanjing, 211189, China

\*Corresponding author. Email: [tao@seu.edu.cn](mailto:tao@seu.edu.cn)

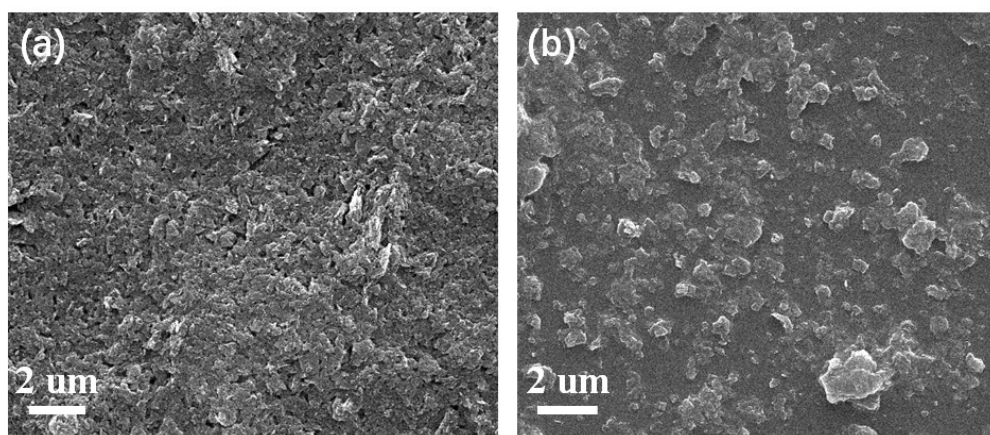

**Figure S1.** SEM of BN nanosheets before (a) and after (b) sonication exfoliation.

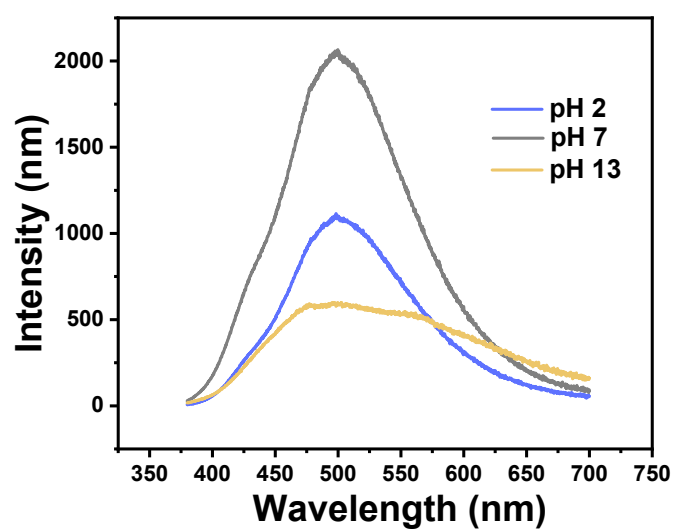

**Figure S2.** PL spectrum of BNQDs with any passivation under different pH.

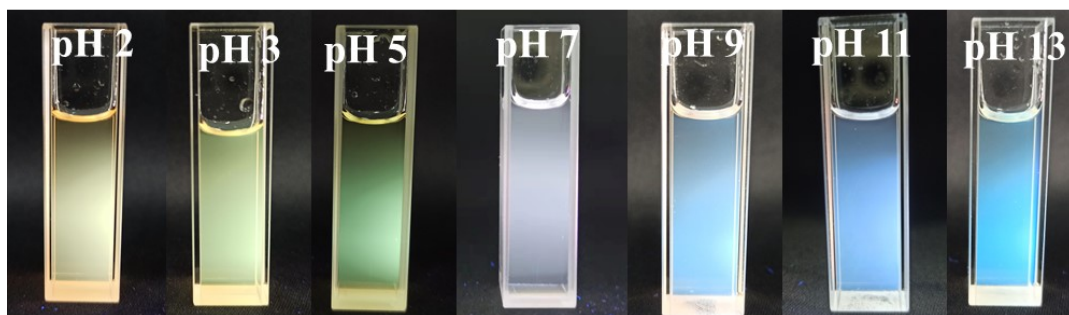

**Figure S3.** The optical images of BNQDs with different pH under 365 nm irradiation.

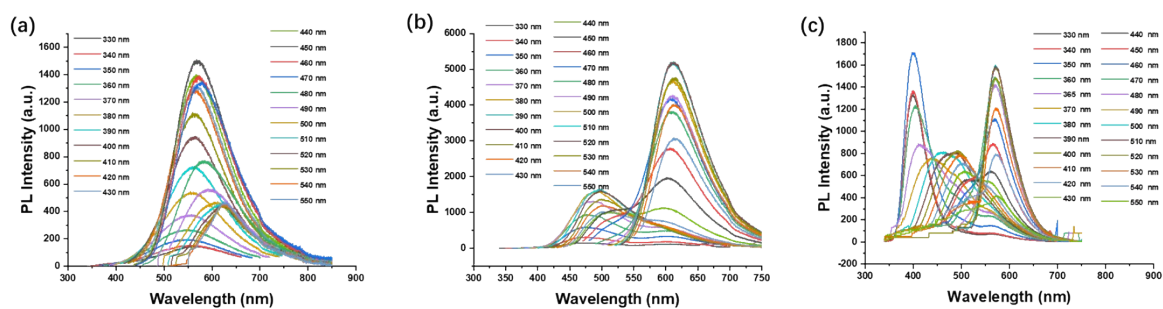

**Figure S4.** PL spectra of BNQDs under different irradiation wavelength at pH of 2 (a), 7 (b), and 13 (c).

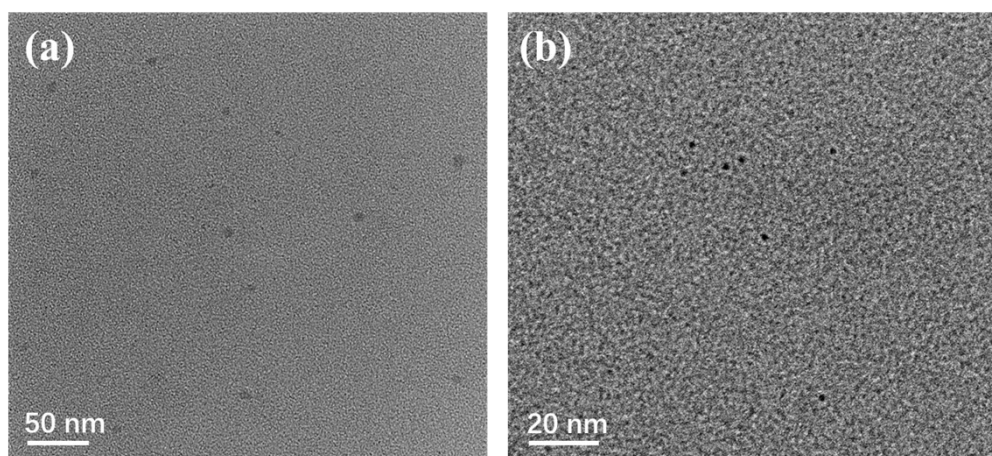

**Figure S5.** TEM of BNQDs by modulating pH of precursor reactants before hydrothermal reaction. The average sizes of QDs are 10 nm under pH 2 (a) and 5 nm under pH 13 (b).

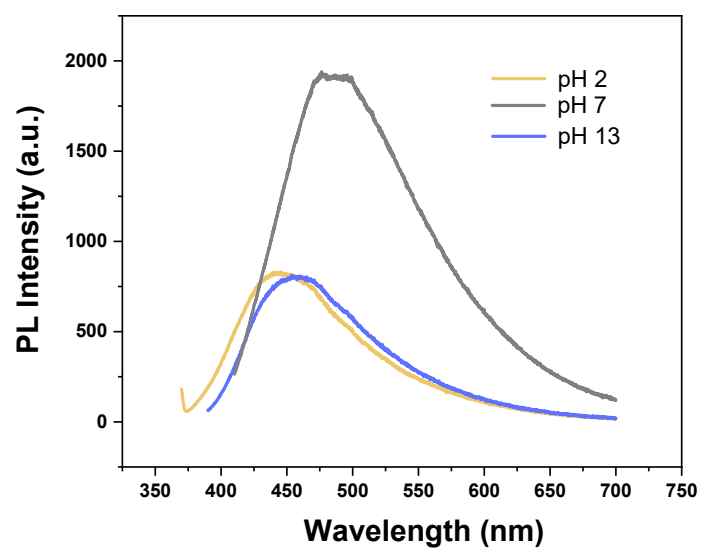

**Figure S6.** PL spectra of QDs by modulating pH of precursor reactants before hydrothermal reaction.

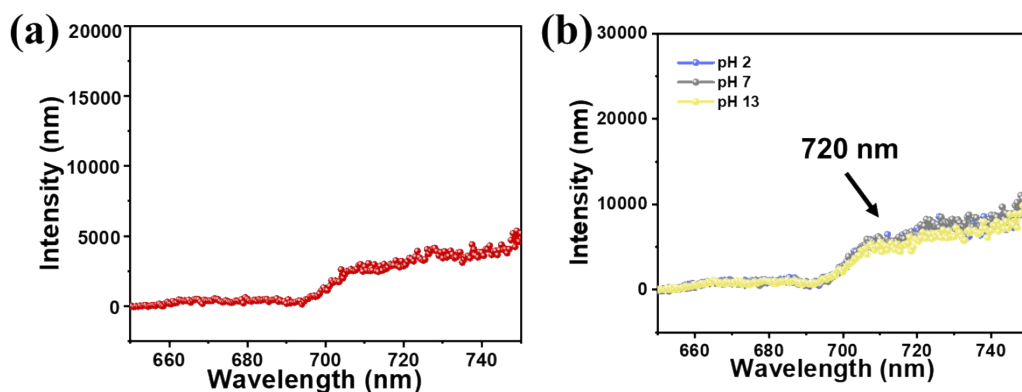

**Figure S7.** (a) Two-photon spectrum of pristine BNQDs without PPD. (b) Two-photon spectrum of BNQDs by modulating pH of precursor reactants before hydrothermal reaction.

Pristine QDs without passivation and the QDs by modulating pH before hydrothermal reaction still show two-photon emission at 720 nm with weak intensity, indicating that it is related with intrinsic electron phonon coupling between  $\pi$ -conjugated BN, rather than outside pH environment or sizes.



**Table S1.** The lifetime of BNQDs under different pH.

| BNQDs | $\tau_1$ | $\tau_2$ |
|-------|----------|----------|
| 2     | 0.93 ns  | 9.99 ns  |
| 7     | 1.08 ns  | 7.29 ns  |
| 13    | 1.21 ns  | 6.83 ns  |

**Table S2.** The QY of BNQDs under different pH.

| QDs with different pH | QY     |
|-----------------------|--------|
| 2                     | 7.64%  |
| 3                     | 7.55%  |
| 5                     | 6.66%  |
| 7                     | 10.50% |
| 9                     | 6.03%  |
| 11                    | 5.49%  |
| 13                    | 4.38%  |
